# Supplementary material for: The effect of hepatopancreas homogenate of the Red king crab on HA-based filler
Source: PeerJ. 2020 Feb 12;8:e8579. doi: 10.7717/peerj.8579 (PMC7023832; doi:10.7717/peerj.8579)
Supplement: Supplemental Information 1 — Data of half-time of spectrum registration of NMR, № spectrum, time of hydrolysis, and multiplicator to plot spectra to obtain Fig. S13. [file peerj-08-8579-s001.xlsx]

## Sheet: №№
mm191003
		Half-time of spectrum registration of NMR, min	№ spectrum	t of hydrolysis, min	t of hydrolysis, h	multiplicator
2019-10-03
15-35	1	30	2	0	0	8	2
15-48	2	7.5	3	16.75	0.279167	32	3
	3	7.5	4	24.25	0.404167		11
	4	7.5	5	31.75	0.529167		19
	5	7.5	6	39.25	0.654167		32
	6	7.5	7	46.75	0.779167		38
	7	7.5	8	54.25	0.904167		49
	8	7.5	9	61.75	1.02917		55
	9	7.5	10	69.25	1.15417
	10	15	11	80.5	1.34167	16
	11	15	12	95.5	1.59167
	12	15	13	110.5	1.84167
	13	15	14	125.5	2.09167
	14	30	15	148	2.46667
	15	30	16	178	2.96667
	16	30	17	208	3.46667
	17	30	18	238	3.96667
	18	60	19	283	4.71667	4
	19	60	20	343	5.71667
	20	60	21	403	6.71667
	21	60	22	463	7.71667
	22	60	23	523	8.71667
	23	60	24	583	9.71667
	24	60	25	643	10.7167
	25	60	26	703	11.7167
	26	60	27	763	12.7167
	27	60	28	823	13.7167
	28	60	29	883	14.7167
	29	60	30	943	15.7167
	30	60	31	1003	16.7167
_09-48	31	60	32	1063	17.7167	4
2019-10-04		COSY	33
13-48	32	120	34	1393	23.2167
15-48	33	240	35	1573	26.2167
	34	240	36	1813	30.2167
	35	240	37	2053	34.2167
_11-48	36	240	38	2293	38.2167	1
2019-10-05		COSY	39
13-48	37	240	40	2893	48.2167
	38	240	41	3133	52.2167
	39	240	42	3373	56.2167
	40	240	43	3613	60.2167
2019-10-06	41	240	44	3853	64.2167
14-48	42	240	45	4393	73.2167
	43	240	46	4633	77.2167
	44	240	47	4873	81.2167
COSY		180	48	5083	84.7167
2019-10-07	45	240	49	5293	88.2167	1
_11-48	46	240	50	5653	94.2167
	47	240	51	5893	98.2167
	48	240	52	6133	102.217
	49	240	53	6373	106.217
COSY		300	54
	50	120	55	6853	114.217	2
				1.00071
	1	30	65	0	0	8
	2	7.5	66	18.7633	0.312722	32
	3	7.5	67	26.2687	0.437811	32
	4	7.5	68	33.774	0.5629	32
	5	7.5	69	41.2794	0.687989	32
	6	7.5	70	48.7847	0.813078	32
	7	7.5	71	56.29	0.938167	32
	8	7.5	72	63.7954	1.06326	32
	9	7.5	73	71.3007	1.18835	32
	10	15	74	82.5587	1.37598	16
	11	15	75	97.5694	1.62616	16
	12	15	76	112.58	1.87633	16
	13	15	77	127.591	2.12651	16
	14	30	78	150.107	2.50178	8
	15	30	79	180.128	3.00214	8
	16	30	80	210.149	3.50249	8
	17	30	81	240.171	4.00285	8
	18	60	82	285.203	4.75338	4
	19	60	83	345.246	5.75409	4
	20	60	84	405.288	6.7548	4
	21	60	85	465.331	7.75552	4
	22	120	86	555.395	9.25658	2
	23	120	87	675.48	11.258	2
	24	120	88	795.566	13.2594	2
	25	120	89	915.651	15.2609	2
	26	240	90	1095.78	18.263	1
	27	240	91	1335.95	22.2658	1
	28	240	92	1576.12	26.2687	1
	29	240	93	1816.29	30.2715	1
	30	240	94	2056.46	34.2744	1
	31	240	95	2296.63	38.2772	1
	32	240	96	2536.8	42.2801	1
	33	240	97	2776.98	46.2829	1
	34	240	98	3017.15	50.2858	1
	35	240	99	3257.32	54.2886	1
	36	240	100	3497.49	58.2915	1
	37	240	101	3737.66	62.2943	1
	38	240	102	3977.83	66.2972	1
	39	240	103	4218	70.3	1
	40	240	104	4460.17	74.3362	1
	41	240	105	4700.34	78.339	1
	42	240	106	4940.51	82.3419	1
	43	240	107	5180.68	86.3447	1
	44	240	108	5420.85	90.3476	1
	45	COSY	109
