# Supplementary material for: The effect of hepatopancreas homogenate of the Red king crab on HA-based filler
Source: PeerJ. 2020 Feb 12;8:e8579. doi: 10.7717/peerj.8579 (PMC7023832; doi:10.7717/peerj.8579)
Supplement: Supplemental Information 2 — Data of half-time of spectrum registration of NMR, № spectrum, time of hydrolysis, and multiplicator to plot spectra to obtain Fig. 5. [file peerj-08-8579-s002.xlsx]

## Sheet: №№
mm191003
		Half-time of spectrum registration of NMR, min	№ spectrum	t hydrolysis, min	t hydrolysis, h	multiplicator
	1	30	2	0	0	8
	2	7.5	3	16.75	0.279167	32
	3	7.5	4	24.25	0.404167	32
	4	7.5	5	31.75	0.529167	32
	5	7.5	6	39.25	0.654167	32
	6	7.5	7	46.75	0.779167	32
	7	7.5	8	54.25	0.904167	32
	8	7.5	9	61.75	1.02917	32
	9	7.5	10	69.25	1.15417	32
	10	15	11	80.5	1.34167	16
	11	15	12	95.5	1.59167	16
	12	15	13	110.5	1.84167	16
	13	15	14	125.5	2.09167	16
	14	30	15	148	2.46667	16
	15	30	16	178	2.96667	16
	16	30	17	208	3.46667	16
	17	30	18	238	3.96667	16
	18	60	19	283	4.71667	4
	19	60	20	343	5.71667	4
	20	60	21	403	6.71667	4
	21	60	22	463	7.71667	4
	22	60	23	523	8.71667	4
	23	60	24	583	9.71667	4
	24	60	25	643	10.7167	4
	25	60	26	703	11.7167	4
	26	60	27	763	12.7167	4
	27	60	28	823	13.7167	4
	28	60	29	883	14.7167	4
	29	60	30	943	15.7167	4
	30	60	31	1003	16.7167	4
	31	60	32	1063	17.7167	4
		COSY	33			4
	32	120	34	1393	23.2167	4
	33	240	35	1573	26.2167	4
	34	240	36	1813	30.2167	4
	35	240	37	2053	34.2167	4
	36	240	38	2293	38.2167	1
		COSY	39
	37	240	40	2893	48.2167	1
	38	240	41	3133	52.2167	1
	39	240	42	3373	56.2167	1
	40	240	43	3613	60.2167	1
	41	240	44	3853	64.2167	1
	42	240	45	4393	73.2167	1
	43	240	46	4633	77.2167	1
	44	240	47	4873	81.2167	1
		180	48	5083	84.7167	1
	45	240	49	5293	88.2167	1
	46	240	50	5653	94.2167	1
	47	240	51	5893	98.2167	1
	48	240	52	6133	102.217	1
	49	240	53	6373	106.217	1
		300	54
	50	120	55	6853	114.217	2

## Sheet: I_C
mm191003
										Int (Etanol)	46573739	TSP, mkM	0.0503971
										Int (TSP)	142009920	Etanol, mkM	0.0495849
										HA, mg/ml~g	2.5	HA, mg	1.5495
										C14H19NO11	363	HA, mkM	4.2686
										HA, mg	619.8	Σm	681.5
										GPK, mg	28.3	HA-%, mkM	4.01805
										D2O, mg	33.4	HA-%, mg	583.421
										№3	641.5	Etanol, mkM/g	0.0849898
										TSP, mg	15.2
										TSP, mkM/g	3.3156
		I отн.					C/C(Et.)			C, mkM/g
	№сп.	N-Ac	N-Ac*	Etanol	t, min	t, h	N-Ac	N-Ac*	Etanol	Ac-N	Ac-N*	Ac-N
												y=y0+a*(1-exp(-b*x))
	2	947770	1.42997e+08	1.18017e+07	0	0	0.080308	12.0363	1	0.00682536	1.02297	y0	0.0411
	3	895312	6.85525e+07	3.02401e+06	16.75	0.279167	0.296068	22.3733	1	0.0251627	1.9015	a	1.501
	4	1.35388e+06	7.91966e+07	2.86426e+06	24.25	0.404167	0.47268	27.1772	1	0.040173	2.30979	b	0.0402
	5	1.66371e+06	8.60894e+07	3.00687e+06	31.75	0.529167	0.553303	28.0776	1	0.0470251	2.38631
	6	2.18284e+06	9.17826e+07	2.89201e+06	39.25	0.654167	0.754783	30.9818	1	0.0641489	2.63314
	7	2434341	9.62554e+07	2.98359e+06	46.75	0.779167	0.815909	31.4457	1	0.069344	2.67256
	8	2.78081e+06	1.00545e+08	3.01412e+06	54.25	0.904167	0.922595	32.4354	1	0.0784112	2.75668
	9	3.11416e+06	1.03697e+08	2.96588e+06	61.75	1.02917	1.05	33.9133	1	0.0892389	2.88229
	10	3.64254e+06	1.06962e+08	3.04452e+06	69.25	1.15417	1.19642	33.9362	1	0.101684	2.88424
	11	7.67756e+06	2.22904e+08	6.22757e+06	80.5	1.34167	1.23283	34.5603	1	0.104778	2.93728
	12	9.28929e+06	2.32891e+08	6.05383e+06	95.5	1.59167	1.53445	36.9355	1	0.130412	3.13914
	13	1.01215e+07	2.41549e+08	6.1042e+06	110.5	1.84167	1.65813	37.9128	1	0.140924	3.22221
	14	1.15514e+07	2.48706e+08	6.10318e+06	125.5	2.09167	1.89268	38.8576	1	0.160859	3.3025
	15	2.64618e+07	516323983	11769007	148	2.46667	2.24843	41.6231	1	0.191094	3.53754
	16	31680570	5.42028e+08	1.20887e+07	178	2.96667	2.62068	42.2169	1	0.222731	3.58801
	17	3.55179e+07	5.58932e+08	1.22847e+07	208	3.46667	2.89123	42.607	1	0.245725	3.62116
	18	3.86944e+07	569956209	1.21027e+07	238	3.96667	3.19716	43.896	1	0.271726	3.73071
	19	92740994	1178489323	24253270	283	4.71667	3.82386	44.7671	1	0.324989	3.80475
	20	1.08526e+08	1.19489e+09	2.40836e+07	343	5.71667	4.50623	45.1082	1	0.382983	3.83374
	21	1.22403e+08	1223153392	2.41955e+07	403	6.71667	5.05891	45.4941	1	0.429956	3.86654
	22	135735473	1.24325e+09	24082240	463	7.71667	5.63633	45.9887	1	0.479031	3.90857
	23	1.49154e+08	1259363418	23955024	523	8.71667	6.22641	46.3456	1	0.529182	3.9389
	24	1.59277e+08	1277037688	2.41716e+07	583	9.71667	6.58944	46.2428	1	0.560035	3.93016
	25	170775122	1.29075e+09	23979381	643	10.7167	7.12175	46.7056	1	0.605276	3.9695
	26	1.79519e+08	1.29583e+09	2.39791e+07	703	11.7167	7.48649	46.5536	1	0.636275	3.95659
	27	189885253	1.30464e+09	2.44706e+07	763	12.7167	7.75973	45.5547	1	0.659498	3.87169
	28	199536879	1310796807	24113525	823	13.7167	8.27489	46.0845	1	0.703282	3.91672
	29	2.085e+08	1.31868e+09	23689362	883	14.7167	8.8014	46.8639	1	0.74803	3.98296
	30	2.17091e+08	1323309946	24415118	943	15.7167	8.89166	45.3088	1	0.755701	3.85079
	31	2.24876e+08	1.32789e+09	2.44749e+07	1003	16.7167	9.18801	45.0673	1	0.780887	3.83026
	32	233306661	1332837216	2.42534e+07	1063	17.7167	9.61955	45.3351	1	0.817564	3.85303
	34	510759558	2673934987	48095686	1393	23.2167	10.6197	44.9765	1	0.902563	3.82255
	35	1083027412	5412287342	94919958	1573	26.2167	11.4099	45.6096	1	0.969726	3.87635
	36	1167765420	5508120484	95253242	1813	30.2167	12.2596	45.5665	1	1.04194	3.87269
	37	1244588242	5655958548	94760118	2053	34.2167	13.1341	46.553	1	1.11626	3.95653
	38	1312880138	5760755352	94767528	2293	38.2167	13.8537	46.9346	1	1.17742	3.98896
	40	1441213424	6081399836	93900876	2893	48.2167	15.3482	49.4158	1	1.30444	4.19984
	41	1485478980	6225437220	93390410	3133	52.2167	15.9061	50.7542	1	1.35186	4.31359
	42	1514885284	6227128146	93198798	3373	56.2167	16.2543	50.5612	1	1.38145	4.29719
	43	1540086858	6258743446	93483148	3613	60.2167	16.4745	50.476	1	1.40016	4.28995
	44	1561305644	6270386176	92621330	3853	64.2167	16.8569	50.8423	1	1.43266	4.32108
	45	1590272468	6297730180	93963702	4393	73.2167	16.9243	50.0987	1	1.4384	4.25788
	46	1602673762	6304320238	94560588	4633	77.2167	16.9486	49.721	1	1.44046	4.22578
	47	1621054120	6319900814	94783392	4873	81.2167	17.1027	49.5746	1	1.45356	4.21334
	49	1645349866	6312223690	93113284	5293	88.2167	17.6704	50.1204	1	1.50181	4.25972
	50	1664330820	6381290000	92700336	5653	94.2167	17.9539	50.8839	1	1.5259	4.32462
	51	1682932416	6398867470	92606046	5893	98.2167	18.173	50.9247	1	1.54452	4.32808
	52	1690808554	6416163798	93226162	6133	102.217	18.1366	50.687	1	1.54143	4.30788
	53	1701776032	6418773248	92269762	6373	106.217	18.4435	51.1218	1	1.56751	4.34483
	55	856633793	3205856211	46304822	6853	114.217	18.4999	50.7339	1	1.5723	4.31186

## Sheet: Ac-N
0.00	2019-02-01
0.28	1.90
0.40	2.31
0.53	2.39
0.65	2.63
0.78	2.67
0.90	2.76
2019-03-01	2.88
1.15	2.88
1.34	2.94
1.59	3.14
1.84	3.22
2019-09-02	3.30
2.47	3.54
2.97	3.59
3.47	3.62
3.97	3.73
4.72	3.80
5.72	3.83
6.72	3.87
7.72	3.91
8.72	3.94
9.72	3.93
10.72	3.97
11.72	3.96
12.72	3.87
13.72	3.92
14.72	3.98
15.72	3.85
16.72	3.83
17.72	3.85
23.22	3.82
26.22	3.88
30.22	3.87
34.22	3.96
38.22	3.99
48.22	4.20
52.22	4.31
56.22	4.30
60.22	4.29
64.22	4.32
73.22	4.26
77.22	4.23
81.22	4.21
88.22	4.26
94.22	4.32
98.22	4.33
102.22	4.31
106.22	4.34
114.22	4.31
